# Supplementary material
Source: PubMed Central journal article supplement (PMC5263092)
Supplement: NIHMS823495-supplement-1.pdf [file NIHMS823495-supplement-1.pdf]

**Table S1. Sensitivity Analyses Examining Effect of Higher Phosphorus Additive Consumption on Outcomes**

|                                 | <b>Main Analysis (n=31)</b> |                | <b>Sensitivity Analysis 1 (n=29)</b> |                | <b>Sensitivity Analysis 2 (n=25)</b> |                |
|---------------------------------|-----------------------------|----------------|--------------------------------------|----------------|--------------------------------------|----------------|
|                                 | <b>Estimate (95% CI)</b>    | <b>P value</b> | <b>Estimate (95% CI)</b>             | <b>P value</b> | <b>Estimate (95% CI)</b>             | <b>P value</b> |
| Albuminuria (mg/d)              | 14.3% (-2.5%, 34.0%)        | 0.1            | 17.3% (0.1%, 37.5%)                  | 0.049          | 23.7% (4.6%, 46.3%)                  | 0.01           |
| FGF23 (RU/ml)                   | 3.4% (-5.9%, 13.6%)         | 0.4            | 2.3% (-7.3%, 12.8%)                  | 0.4            | 1.0% (-9.6%, 12.9%)                  | 0.9            |
| Intact PTH <sup>1</sup> (pg/ml) | 15.9% (3.8%, 29.5%)         | 0.01           | 14.5% (1.8%, 28.7%)                  | 0.02           | 17.3% (3.3%, 33.3%)                  | 0.01           |
| Serum phosphorus (mg/dL)        | -0.10 (-0.29, 0.09)         | 0.3            | -0.11 (-0.32, 0.09)                  | 0.3            | -0.08 (-0.32, 0.16)                  | 0.5            |
| SBP (mmHg)                      | -1.1 (-4.1, 1.9)            | 0.5            | -0.5 (-3.5, 2.6)                     | 0.8            | -1.2 (-4.6, 2.1)                     | 0.5            |
| DBP (mmHg)                      | -0.8 (-2.7, 1.0)            | 0.4            | -0.5 (-2.3, 1.4)                     | 0.6            | -1.3 (-3.2, 0.6)                     | 0.2            |

Sensitivity Analysis 1 excluding non-compliant patients, based on missing product pickups and follow-up visits

Sensitivity Analysis 2 excluding patients suspected to be poorly compliant based on 24-hour urine phosphorus excretion data (<250 mg difference between the higher and lower period)

Abbreviations: FGF23 (fibroblast growth factor 23), PTH (parathyroid hormone), SBP (systolic blood pressure), DBP (diastolic blood pressure)
